# Supplementary material for: Interleukin-10-Mediated Lymphopenia Caused by Acute Infection with Foot-and-Mouth Disease Virus in Mice
Source: MDPI journal article supplement (doi:10.3390/v13122358), 2021-11-24
Supplement: s1 [file s1]

**Table S1.** The detailed information of antibodies used for flow cytometry.

| Antibody                 | Fluorescence | Clone          | Company   | Catalog   |
|--------------------------|--------------|----------------|-----------|-----------|
| Anti-mouse CD3           | APC          | K3T            | BD        | MCA500APC |
| Anti-mouse CD3           | PE           | 145-2c11       | Biolegend | 100307    |
| Anti-mouse CD3           | PE/Cy7       | 145-2c11       | Biolegend | 100302    |
| Anti-mouse CD19          | PE           | 6D5            | Biolegend | 115508    |
| Anti-mouse CD19          | APC          | 6D5            | Biolegend | 115512    |
| Anti-mouse NK1.1         | APC          | PK136          | Biolegend | 108710    |
| Anti-mouse NK1.1         | PE           | PK136          | Biolegend | 108708    |
| Anti-mouse CD4           | FITC         | GK1.5          | BD        | MCA4635F  |
| Anti-mouse CD8           | PE           | YTS169.4       | BD        | MCA1768PE |
| Anti-mouse CD8           | Percp        | 53-6.7         | Biolegend | 100732    |
| Anti-mouse CD244 (2B4)   | APC          | m2B4 (B6)458.1 | Biolegend | 133517    |
| APC isotype control      | APC          | MOPC-21        | Biolegend | 400119    |
| Anti-mouse CD160         | PE           | 7H1            | Biolegend | 143003    |
| PE isotype control       | PE           | RTK2758        | Biolegend | 400507    |
| Anti-mouse CD223 (LAG-3) | APC          | C9B7W          | Biolegend | 125210    |
| APC isotype control      | APC          | RTK2071        | Biolegend | 400411    |
| Anti-mouse CD366 (Tim-3) | PE/Cy7       | B8.2C12        | Biolegend | 134010    |
| PE/Cy7 isotype control   | PE/Cy7       | RTK2071        | Biolegend | 400415    |
| Anti-mouse TIGIT         | BV421        | 1G9            | Biolegend | 142111    |
| BV421 isotype control    | BV421        | MOPC-21        | Biolegend | 400157    |
| Anti-mouse PD-1          | PE/Cy7       | 29F.1A12       | Biolegend | 135216    |
| PE/Cy7 isotype control   | PE/Cy7       | RTK2758        | Biolegend | 400521    |
| Anti-mouse CTLA-4        | PE           | UC10-4B9       | Biolegend | 106305    |
| CTLA-4 isotype control   | PE           | HTK888         | Biolegend | 400907    |

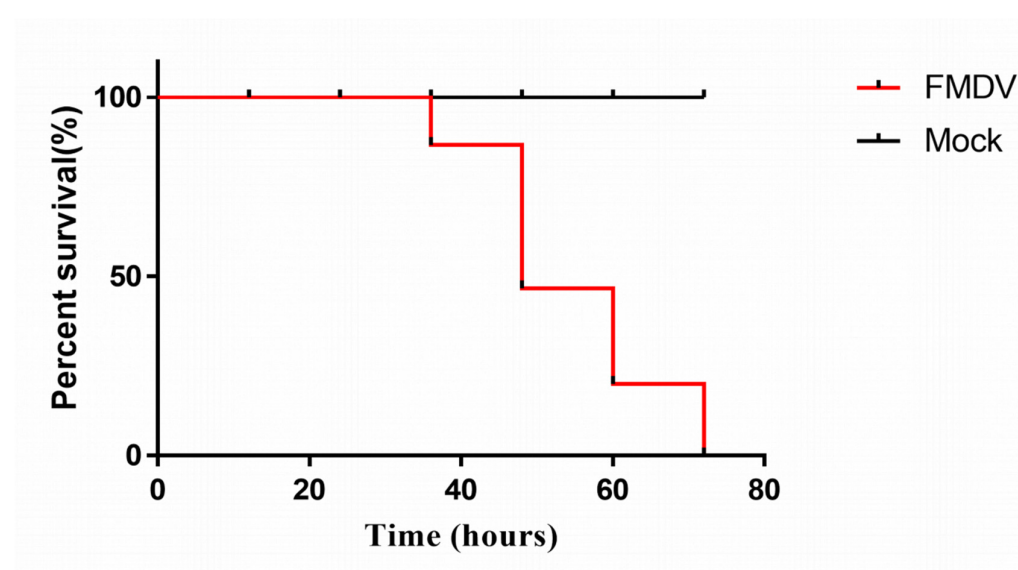

**Figure S1.** The survival curve of mice infected with FMDV (n=15).

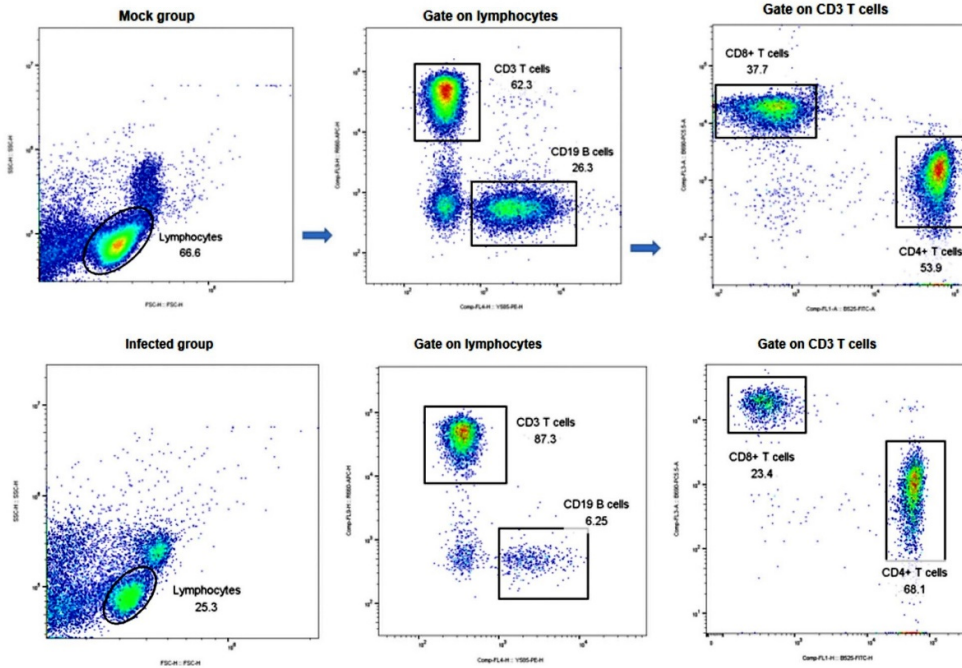

**Figure S2.** Representative FACS plots of CD3+T cells, CD19+B cells, CD3+CD4+ and CD3+CD8+ T cells from mock and FMDV-infected mice at 48 hpi.

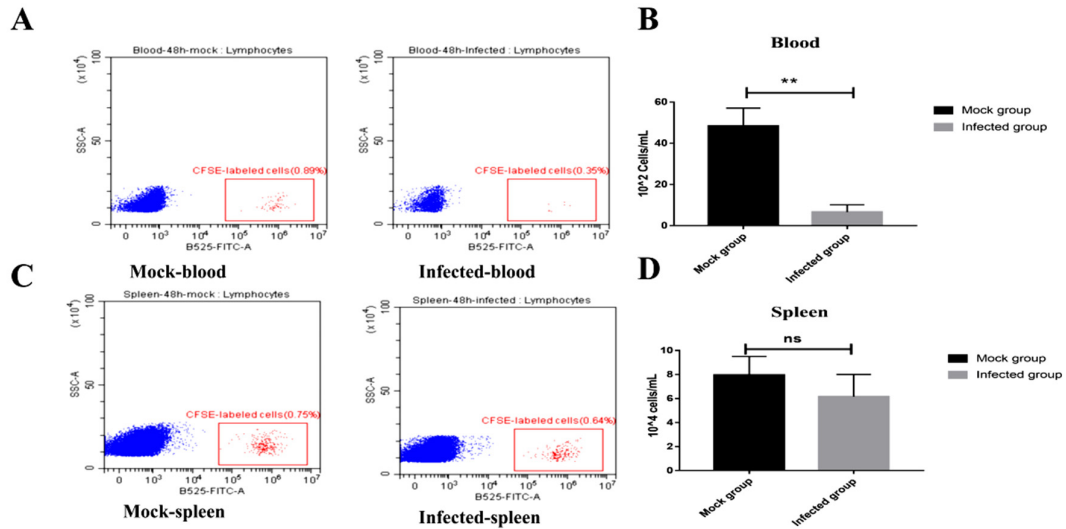

**Figure S3.** The CFSE-labeled lymphocytes in peripheral blood and spleen. A). Representative FACS plots of CFSE-labeled lymphocytes in blood from mock and FMDV-infected mice. B). CFSE-labeled lymphocytes in blood were significantly decreased in FMDV-infected mice compared with mock mice. C). Representative FACS plots of CFSE-labeled lymphocytes in spleen from mock and FMDV-infected mice. D). CFSE-labeled lymphocytes in spleen were decreased in FMDV-infected mice compared with mock mice.

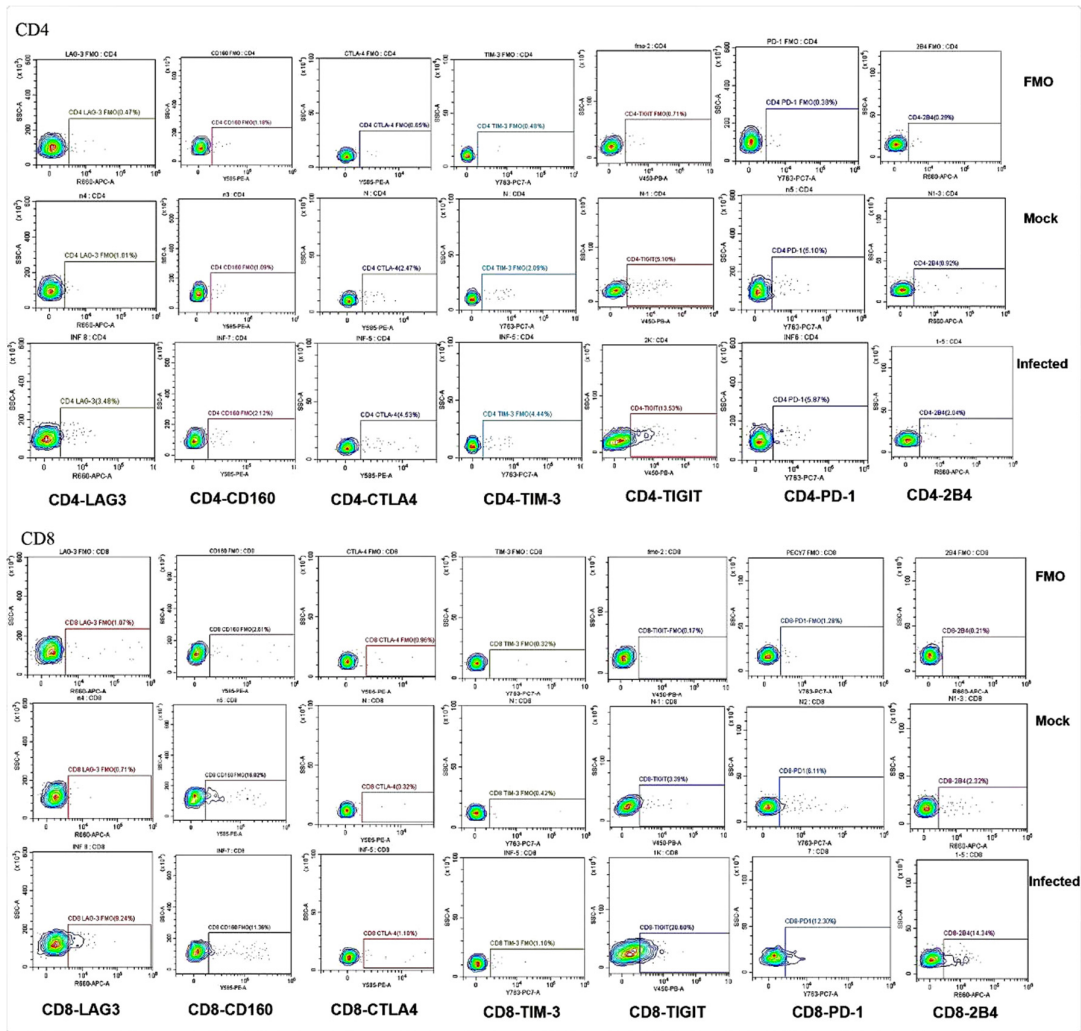

**Figure S4.** Representative FACS plots of PD-1, CTLA-4, Tim-3, LAG-3, 2B4, TIGIT and CD160 on CD4 and CD8 T cells from mock and FMDV-infected mice.

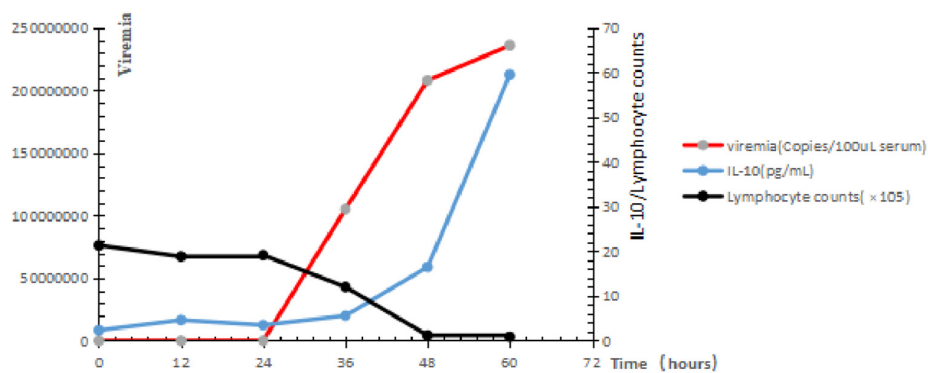

**Figure S5.** The trend of viremia, lymphocytes count in peripheral blood, and IL-10 concentration in serum during FMDV infection.

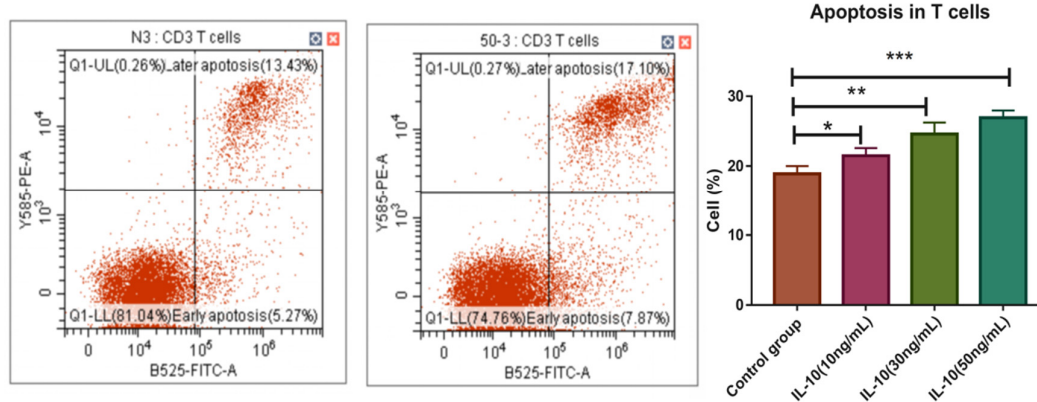

**Figure S6.** T cells apoptosis was induced by IL-10 *in vitro*.
